# Supplementary material
Source: PubMed Central journal article supplement (PMC3515681)
Supplement: NIHMS422935-supplement-Supplement1.pdf [file NIHMS422935-supplement-Supplement1.pdf]

## Supplementary Appendix

This appendix has been provided by the authors to give readers additional information about their work.

Supplement to: Sasson C, Magid DJ, Chan P, et al. Association of neighborhood characteristics with bystander-initiated CPR. *N Engl J Med* 2012;367:1607-15. DOI: 10.1056/NEJMoa1110700

**SUPPLEMENTARY APPENDIX**

**TABLE OF CONTENTS**

|                                                     |                |
|-----------------------------------------------------|----------------|
| <b>Definition of Out-Of-Hospital Cardiac Arrest</b> | <b>Page 2</b>  |
| <b>Supplementary Appendix Figure 1S.</b>            | <b>Page 3</b>  |
| <b>Supplementary Appendix Figure 2S.</b>            | <b>Page 4</b>  |
| <b>Supplementary Appendix Figure 3AS.</b>           | <b>Page 5</b>  |
| <b>Supplementary Appendix Figure 3BS.</b>           | <b>Page 6</b>  |
| <b>Supplementary Appendix Figure 4S.</b>            | <b>Page 7</b>  |
| <b>Supplementary Appendix Table 1S.</b>             | <b>Page 8</b>  |
| <b>Supplementary Appendix Table 2S.</b>             | <b>Page 9</b>  |
| <b>Supplementary Appendix Table 3S.</b>             | <b>Page 17</b> |
| <b>The CARES Surveillance Group</b>                 | <b>Page 18</b> |

### **Definition of Out-Of-Hospital Cardiac Arrest.**

CARES includes data on persons of any age who have an out-of-hospital cardiac arrest event and who receive resuscitative efforts (e.g., CPR or defibrillation). Patients with obvious signs of death (e.g. rigor mortis or dependent lividity) or for whom a “do not resuscitate” (DNR) order is respected are not included. The event must have occurred as the result of a presumed cardiac etiology on the basis of the clinical judgment of the care providers. Noncardiac etiologies (e.g., trauma, drowning, overdose, asphyxia, electrocution, primary respiratory arrest, or other noncardiac etiologies) are excluded from analyses. A patient would be entered into the registry multiple times if he/she has more than one out-of-hospital cardiac arrest event in which resuscitative efforts are initiated.

**Supplementary Appendix Figure 1S.** Map of CARES sites included in analysis.

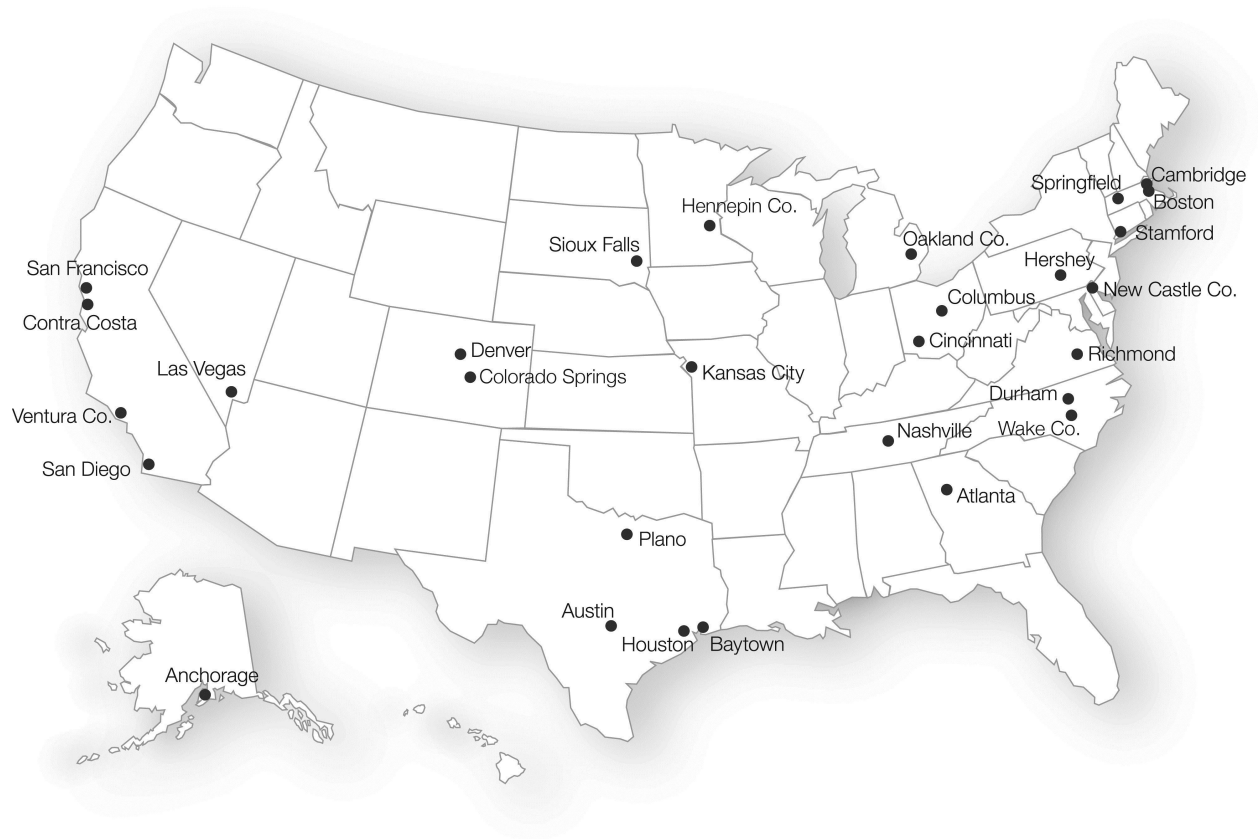

**Supplementary Appendix Figure 2S:** Flowchart of patients included in study sample.

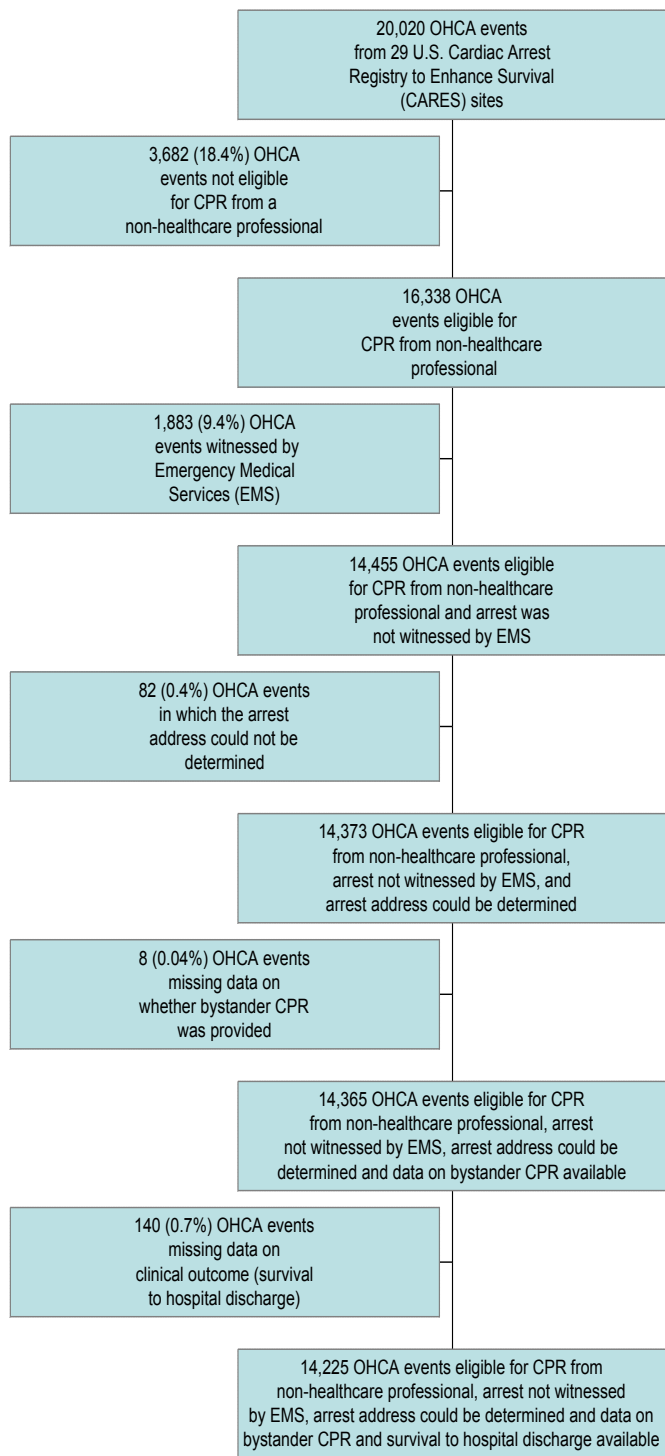

**Supplementary Appendix Figure 3AS.** 10-fold cross-validation of the final model. Calibration assessed by comparing observed versus expected CPR prevalence. Hosmer-Lemeshow goodness-of-fit  $P=0.23$ .

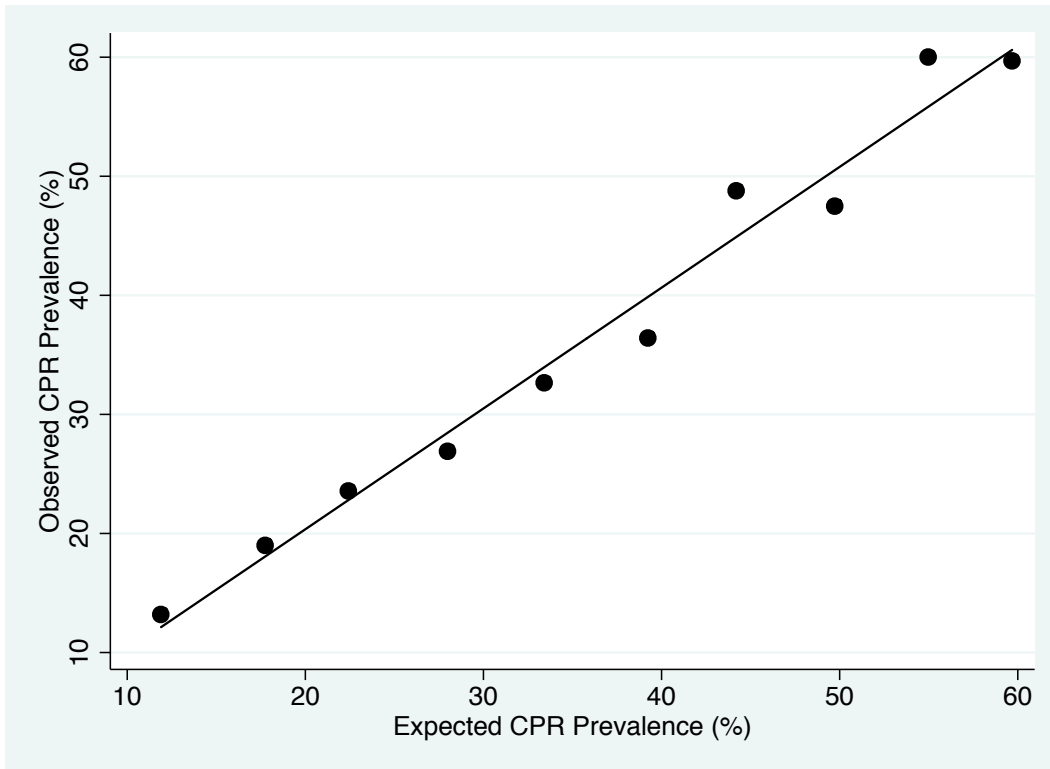

**Supplementary Appendix Figure 3BS.** 10-fold cross-validation of the model. Discrimination assessed using a receiver operating characteristics curve. AUC=0.64.

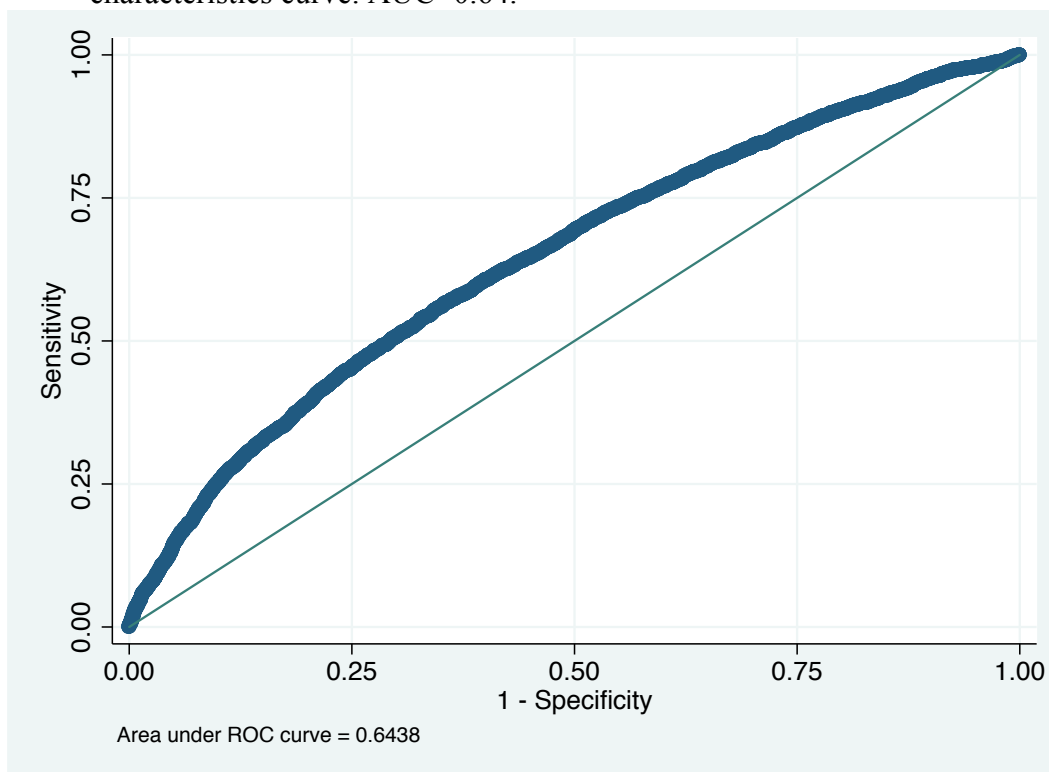

**Supplementary Appendix Figure 4S.** Predicted probability of receiving bystander cardiopulmonary resuscitation (CPR) across 29 U.S. CARES Sites.

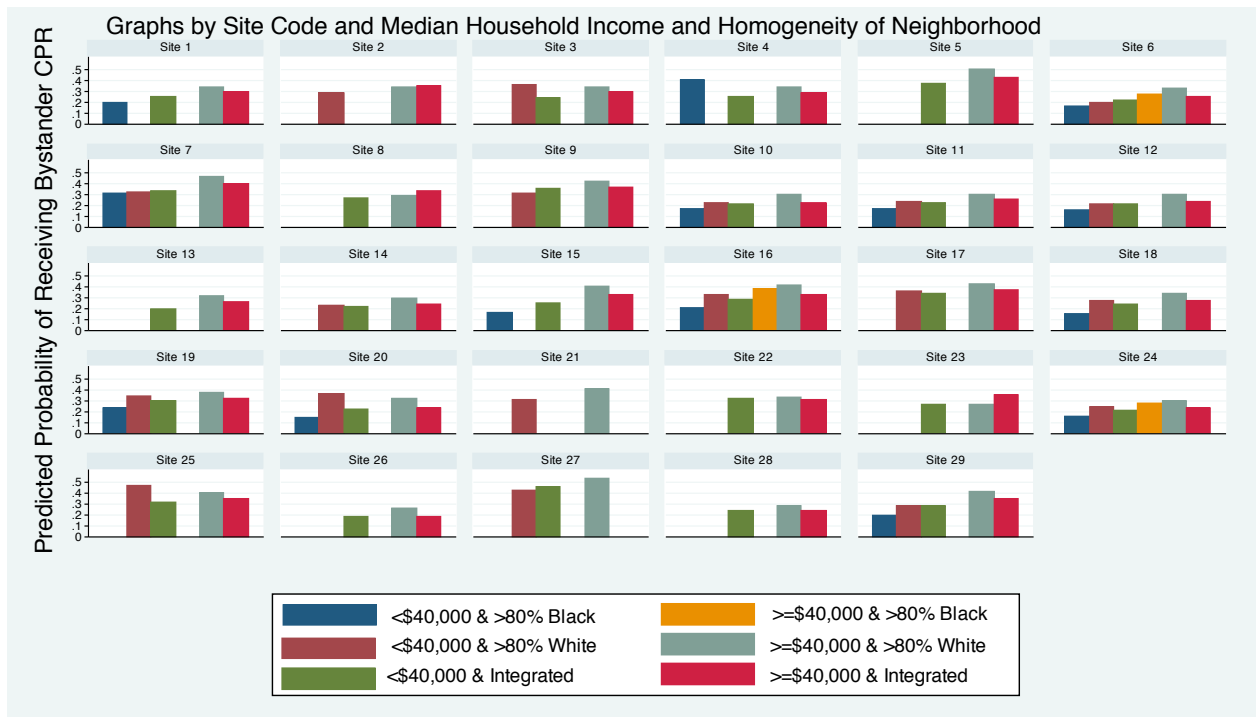



**Supplementary Appendix Table 1S.** Additional patient characteristics according to whether or not bystander-initiated CPR was performed.

|                                           | <b><u>Received<br/>Bystander-Initiated<br/>CPR<br/>(N=4,068)</u></b> | <b><u>Did Not Receive<br/>Bystander-<br/>Initiated CPR<br/>(N=10,157)</u></b> | <b><u>TOTAL<br/>(N=14,225)</u></b> |
|-------------------------------------------|----------------------------------------------------------------------|-------------------------------------------------------------------------------|------------------------------------|
| <b>Was an AED Used</b>                    |                                                                      |                                                                               |                                    |
| Yes                                       | 1,302 (31)                                                           | 2,842 (69)                                                                    | 4,144                              |
| No                                        | 2,765 (27)                                                           | 7,314 (73)                                                                    | 10,079                             |
| Missing                                   | 1 (50)                                                               | 1 (50)                                                                        | 2                                  |
| <b>Presenting Rhythm</b>                  |                                                                      |                                                                               |                                    |
| Asystole                                  | 1,745 (26)                                                           | 4,995 (74)                                                                    | 6,740                              |
| VF/VT/Unknown Shockable                   | 1,358 (38)                                                           | 2,250 (62)                                                                    | 3,608                              |
| Pulseless Electrical Activity             | 510 (23)                                                             | 1,747 (77)                                                                    | 2,257                              |
| Unknown Unshockable                       | 451 (28)                                                             | 1,155 (72)                                                                    | 1,606                              |
| Unknown                                   | 4 (29)                                                               | 10 (71)                                                                       | 14                                 |
| <b>Survival to Hospital Admission§</b>    | 1,138 (28)                                                           | 2,314 (23)                                                                    | 3,452                              |
| <b>Survival to Hospital Discharge§</b>    | 482 (12)                                                             | 662 (6)                                                                       | 1,144                              |
| <b>Neurological Outcome at Discharge§</b> |                                                                      |                                                                               |                                    |
| CPC 1                                     | 282 (7)                                                              | 305 (3)                                                                       | 587                                |
| CPC 2                                     | 83 (2)                                                               | 132 (1)                                                                       | 215                                |
| CPC 3                                     | 49 (1)                                                               | 77 (1)                                                                        | 126                                |
| CPC 4                                     | 26 (1)                                                               | 60 (1)                                                                        | 86                                 |
| CPC Unknown                               | 42 (1)                                                               | 88 (1)                                                                        | 130                                |

Abbreviations: AED (Automated External Defibrillator), VF (Ventricular Fibrillation), VT (Ventricular Tachycardia), CPC (Cerebral Performance Category)

All values reported as N (%).

§ Reported as column proportions (not row proportions).

**Supplementary Appendix Table 2S.** Adjusted models for provision of bystander CPR (cardiopulmonary resuscitation).

|                                                            | <b>Empty Model</b> | <b>Model 1</b>            | <b>Model 2</b>            |
|------------------------------------------------------------|--------------------|---------------------------|---------------------------|
| <b>Variance Neighborhood Level 2 (n=2403)</b>              | <b>0.257</b>       | <b>0.182</b>              | <b>0.162</b>              |
| <b>Variance Site Level 3 (n=29)</b>                        | <b>0.122</b>       | <b>0.16</b>               | <b>0.123</b>              |
| <b><u>INDIVIDUAL LEVEL VARIABLES</u></b>                   |                    |                           |                           |
| <b>Age (Decades)</b>                                       |                    | <b>0.94 (0.92-0.96)**</b> |                           |
| <b>Female</b>                                              |                    | <b>0.99 (0.92-1.08)</b>   |                           |
| <b>Race/Ethnicity</b>                                      |                    |                           |                           |
| <b>White</b>                                               |                    | <b>Ref</b>                |                           |
| <b>Black</b>                                               |                    | <b>0.65 (0.59-0.73)**</b> |                           |
| <b>Latino</b>                                              |                    | <b>0.72 (0.61-0.86)**</b> |                           |
| <b>Other</b>                                               |                    | <b>0.93 (0.72-1.19)</b>   |                           |
| <b>Unknown</b>                                             |                    | <b>0.77 (0.66-0.89)**</b> |                           |
| <b>Witnessed Arrest</b>                                    |                    | <b>2.03 (1.88-2.20)**</b> |                           |
| <b>Public Arrest</b>                                       |                    | <b>1.66 (1.51-1.84)**</b> |                           |
| <b><u>NEIGHBORHOOD LEVEL VARIABLES</u></b>                 |                    |                           |                           |
| <b>Median Household Income (per \$10,000)</b>              |                    |                           | <b>1.07 (1.04-1.10)**</b> |
| <b>Median Household Income Category</b>                    |                    |                           |                           |
| <b>&lt;\$25000</b>                                         |                    |                           |                           |
| <b>\$25001-\$40,000</b>                                    |                    |                           |                           |
| <b>\$40,001-\$50,000</b>                                   |                    |                           |                           |
| <b>\$50,001-\$65,000</b>                                   |                    |                           |                           |
| <b>&gt;\$65,001</b>                                        |                    |                           |                           |
| <b>Racial Composition of Neighborhood</b>                  |                    |                           |                           |
| <b>&gt;90% Black</b>                                       |                    |                           | <b>0.80 (0.65-0.97)*</b>  |
| <b>Integrated</b>                                          |                    |                           | <b>Ref</b>                |
| <b>&gt;90% White</b>                                       |                    |                           | <b>1.15 (1.00-1.33)</b>   |
| <b>Racial Composition of Neighborhood</b>                  |                    |                           |                           |
| <b>&gt;80% Black</b>                                       |                    |                           |                           |
| <b>Integrated</b>                                          |                    |                           |                           |
| <b>&gt;80% White</b>                                       |                    |                           |                           |
| <b>SinglePerson Households (per 10% increase)</b>          |                    |                           | <b>1.00 (1.00-1.01)</b>   |
| <b>Median Age of Census Tract</b>                          |                    |                           | <b>0.99 (0.98-0.99)*</b>  |
| <b>High School Diploma and Above (per 10% increase)</b>    |                    |                           | <b>1.07 (1.02-1.12)*</b>  |
| <b>Adults Living Below Poverty Line (per 10% increase)</b> |                    |                           | <b>0.95 (0.88-1.02)</b>   |

*Odds Ratio (95% Confidence Interval)*

*P value \*<0.05 \*\*<0.001*

|                                                     | Model 3            | Model 4            | Model 5           |
|-----------------------------------------------------|--------------------|--------------------|-------------------|
| Variance Neighborhood Level 2 (n=2403)              | 0.157              | 0.152              | 0.149             |
| Variance Site Level 3 (n=29)                        | 0.118              | 0.129              | 0.123             |
| <b>INDIVIDUAL LEVEL VARIABLES</b>                   |                    |                    |                   |
| Age (Decades)                                       |                    |                    |                   |
| Female                                              |                    |                    |                   |
| Race/Ethnicity                                      |                    |                    |                   |
| White                                               |                    |                    |                   |
| Black                                               |                    |                    |                   |
| Latino                                              |                    |                    |                   |
| Other                                               |                    |                    |                   |
| Unknown                                             |                    |                    |                   |
| Witnessed Arrest                                    |                    |                    |                   |
| Public Arrest                                       |                    |                    |                   |
| <b>NEIGHBORHOOD LEVEL VARIABLES</b>                 |                    |                    |                   |
| Median Household Income (per \$10,000)              | 1.06 (1.03-1.09)** |                    |                   |
| Median Household Income Category                    |                    |                    |                   |
| <\$25000                                            |                    | 0.80 (0.59-1.08)   | 0.86 (0.63-1.17)  |
| \$25001-\$40,000                                    |                    | 0.72 (0.60-0.87)** | 0.77 (0.64-0.93)* |
| \$40,001-\$50,000                                   |                    | 0.80 (0.69-0.93)*  | 0.84 (0.72-0.98)* |
| \$50,001-\$65,000                                   |                    | 0.81 (0.71-0.94)*  | 0.83 (0.72-0.98)* |
| >\$65,001                                           |                    | Ref                | Ref               |
| Racial Composition of Neighborhood                  |                    |                    |                   |
| >90% Black                                          |                    | 0.80 (0.66-0.97)*  |                   |
| Integrated                                          |                    | Ref                |                   |
| >90% White                                          |                    | 1.18 (1.02-1.36)*  |                   |
| Racial Composition of Neighborhood                  |                    |                    |                   |
| >80% Black                                          | 0.75 (0.63-0.88)*  |                    | 0.75 (0.63-0.88)* |
| Integrated                                          | Ref                |                    | Ref               |
| >80% White                                          | 1.18 (1.05-1.33)*  |                    | 1.18 (1.05-1.33)* |
| SinglePerson Households (per 10% increase)          | 1.00 (1.00-1.01)   | 1.00 (1.00-1.01)   | 0.99 (1.00-1.01)  |
| Median Age of Census Tract                          | 0.99 (0.98-1.00)   | 0.99 (0.98-0.99)*  | 0.99 (0.98-1.00)  |
| High School Diploma and Above (per 10% increase)    | 1.07 (1.02-1.12)*  | 1.07 (1.03-1.12)*  | 1.07 (1.03-1.12)* |
| Adults Living Below Poverty Line (per 10% increase) | 0.97 (0.90-1.04)   | 0.90 (0.82-0.98)*  | 0.92 (0.84-1.00)  |

Odds Ratio (95% Confidence Interval)

P value \*<0.05 \*\*<0.001

|                                                     | Model 6            | Model 7            | Model 8            |
|-----------------------------------------------------|--------------------|--------------------|--------------------|
| Variance Neighborhood Level 2 (n=2403)              | 0.12               | 0.124              | 0.123              |
| Variance Site Level 3 (n=29)                        | 0.14               | 0.126              | 0.122              |
| <b>INDIVIDUAL LEVEL VARIABLES</b>                   |                    |                    |                    |
| Age (Decades)                                       | 0.94 (0.92-0.96)** | 0.94 (0.92-0.96)** | 0.94 (0.92-0.96)** |
| Female                                              | 1.00 (0.92-1.09)   | 1.01 (0.93-1.09)   | 1.01 (0.93-1.09)   |
| Race/Ethnicity                                      |                    |                    |                    |
| White                                               | Ref                | Ref                | Ref                |
| Black                                               | 0.73 (0.65-0.81)** | 0.76 (0.68-0.85)** | 0.79 (0.70-0.88)** |
| Latino                                              | 0.72 (0.61-0.86)** | 0.78 (0.65-0.93)*  | 0.78 (0.65-0.94)*  |
| Other                                               | 0.94 (0.74-1.25)   | 0.96 (0.74-1.23)   | 0.97 (0.76-1.25)   |
| Unknown                                             | 0.89 (0.81-0.99)*  | 0.90 (0.79-1.02)   | 0.91 (0.82-1.02)   |
| Witnessed Arrest                                    | 1.98 (1.83-2.14)** | 2.00 (1.85-2.17)** | 2.00 (1.85-2.17)** |
| Public Arrest                                       | 1.72 (1.56-1.90)** | 1.69 (1.53-1.87)** | 1.69 (1.53-1.86)** |
| <b>NEIGHBORHOOD LEVEL VARIABLES</b>                 |                    |                    |                    |
| Median Household Income (per \$10,000)              |                    |                    |                    |
| Median Household Income Category                    |                    |                    |                    |
| <\$25000                                            | 0.48 (0.41-0.56)** |                    |                    |
| \$25001-\$40,000                                    | 0.57 (0.50-0.65)** |                    |                    |
| \$40,001-\$50,000                                   | 0.74 (0.64-0.84)** |                    |                    |
| \$50,001-\$65,000                                   | 0.79 (0.69-0.90)** |                    |                    |
| >\$65,001                                           | Ref                |                    |                    |
| Racial Composition of Neighborhood                  |                    |                    |                    |
| >90% Black                                          |                    | 0.92 (0.76-1.13)   |                    |
| Integrated                                          |                    | Ref                |                    |
| >90% White                                          |                    | 1.18 (1.03-1.36)*  |                    |
| Racial Composition of Neighborhood                  |                    |                    |                    |
| >80% Black                                          |                    |                    | 0.87 (0.73-1.04)   |
| Integrated                                          |                    |                    | Ref                |
| >80% White                                          |                    |                    | 1.22 (1.09-1.36)*  |
| SinglePerson Households (per 10% increase)          |                    | 1.00 (1.00-1.01)   | 1.00 (0.99-1.00)   |
| Median Age of Census Tract                          |                    | 0.99 (0.98-1.00)   | 0.99 (0.98-1.00)   |
| High School Diploma and Above (per 10% increase)    |                    | 1.08 (1.03-1.13)*  | 1.06 (1.02-1.11)*  |
| Adults Living Below Poverty Line (per 10% increase) |                    | 0.89 (0.83-0.95)*  | 0.90 (0.84-0.96)*  |

Odds Ratio (95% Confidence Interval)

P value \*<0.05 \*\*<0.001

|                                                       | Model 9            | Model 10           | Model 11           |
|-------------------------------------------------------|--------------------|--------------------|--------------------|
| Variance Neighborhood Level 2 (n=2403)                | 0.14               | 0.138              | 0.151              |
| Variance Site Level 3 (n=29)                          | 0.122              | 0.128              | 0.11               |
| <b>INDIVIDUAL LEVEL VARIABLES</b>                     |                    |                    |                    |
| Age (Decades)                                         | 0.94 (0.92-0.96)** | 0.94 (0.92-0.96)** | 0.94 (0.92-0.96)** |
| Female                                                | 1.00 (0.92-1.09)   | 1.00 (0.92-1.09)   | 1.00 (0.92-1.08)   |
| Race/Ethnicity                                        |                    |                    |                    |
| White                                                 | Ref                | Ref                | Ref                |
| Black                                                 | 0.72 (0.65-0.81)** | 0.74 (0.66-0.82)** | 0.72 (0.64-0.80)** |
| Latino                                                | 0.71 (0.60-0.85)** | 0.72 (0.60-0.86)** | 0.70 (0.59-0.84)** |
| Other                                                 | 0.94 (0.74-1.21)   | 0.95 (0.74-1.23)   | 0.94 (0.73-1.21)   |
| Unknown                                               | 0.90 (0.80-1.00)   | 0.90 (0.81-1.00)   | 0.89 (0.78-1.03)   |
| Witnessed Arrest                                      | 2.00 (1.84-2.16)** | 1.99 (1.84-2.16)** | 2.01 (1.85-2.17)** |
| Public Arrest                                         | 1.69 (1.53-1.86)** | 1.70 (1.55-1.88)** | 1.69 (1.53-1.86)** |
| <b>NEIGHBORHOOD LEVEL VARIABLES</b>                   |                    |                    |                    |
| <b>Median Household Income and Racial Composition</b> |                    |                    |                    |
| <b>\$50,000 &amp; 90% Threshold</b>                   |                    |                    |                    |
| <\$50,000 & >90% Black                                | 0.49 (0.39-0.61)** |                    |                    |
| <\$50,000 & Integrated                                | 0.62 (0.54-0.72)** |                    |                    |
| <\$50,000 & >90% White                                | 0.85 (0.65-1.10)   |                    |                    |
| ≥\$50,000 & >90% Black                                | 0.69 (0.34-1.44)   |                    |                    |
| ≥\$50,000 & Integrated                                | 0.87 (0.75-1.02)   |                    |                    |
| ≥\$50,000 & >90% White                                | Ref                |                    |                    |
| <b>\$40,000 &amp; 90% Threshold</b>                   |                    |                    |                    |
| <\$40,000 & >90% Black                                |                    | 0.48 (0.39-0.60)** |                    |
| <\$40,000 & Integrated                                |                    | 0.59 (0.51-0.68)** |                    |
| <\$40,000 & >90% White                                |                    | 0.85 (0.56-1.30)   |                    |
| ≥\$40,000 & >90% Black                                |                    | 0.87 (0.46-1.63)   |                    |
| ≥\$40,000 & Integrated                                |                    | 0.84 (0.74-0.97)*  |                    |
| ≥\$40,000 & >90% White                                |                    | Ref                |                    |
| <b>\$30,000 &amp; 90% Threshold</b>                   |                    |                    |                    |
| <\$30,000 & >90% Black                                |                    |                    | 0.50 (0.39-0.63)** |
| <\$30,000 & Integrated                                |                    |                    | 0.58 (0.49-0.68)** |
| <\$30,000 & >90% White                                |                    |                    | 1.36 (0.48-3.86)   |
| ≥\$30,000 & >90% Black                                |                    |                    | 0.60 (0.41-0.86)** |
| ≥\$30,000 & Integrated                                |                    |                    | 0.78 (0.69-0.89)** |
| ≥\$30,000 & >90% White                                |                    |                    | Ref                |

Odds Ratio (95% Confidence Interval)

P value \*<0.05 \*\*<0.001

|                                                       | Model 12           | Model 13           | Model 14           |
|-------------------------------------------------------|--------------------|--------------------|--------------------|
| Variance Neighborhood Level 2 (n=2403)                | 0.136              | 0.133              | 0.142              |
| Variance Site Level 3 (n=29)                          | 0.118              | 0.075              | 0.114              |
| <b>INDIVIDUAL LEVEL VARIABLES</b>                     |                    |                    |                    |
| Age (Decades)                                         | 0.94 (0.92-0.96)** | 0.94 (0.92-0.96)** | 0.94 (0.92-0.96)** |
| Female                                                | 1.00 (0.93-1.09)   | 1.01 (0.93-1.09)   | 1.00 (0.92-1.09)   |
| Race/Ethnicity                                        |                    |                    |                    |
| White                                                 | Ref                | Ref                | Ref                |
| Black                                                 | 0.76 (0.68-0.85)** | 0.78 (0.70-0.87)** | 0.77 (0.68-0.86)** |
| Latino                                                | 0.72 (0.60-0.86)** | 0.73 (0.61-0.87)*  | 0.72 (0.60-0.87)*  |
| Other                                                 | 0.97 (0.75-1.23)   | 0.94 (0.74-1.21)   | 0.97 (0.76-1.25)   |
| Unknown                                               | 0.90 (0.81-1.00)   | 0.80 (0.72-0.89)   | 0.90 (0.81-1.01)   |
| Witnessed Arrest                                      | 2.00 (1.85-2.16)** | 2.01 (1.85-2.17)** | 2.01 (1.85-2.17)** |
| Public Arrest                                         | 1.69 (1.53-1.86)** | 1.70 (1.54-1.87)** | 1.69 (1.53-1.86)** |
| <b>NEIGHBORHOOD LEVEL VARIABLES</b>                   |                    |                    |                    |
| <b>Median Household Income and Racial Composition</b> |                    |                    |                    |
| <b>\$50,000 &amp; 80% Threshold</b>                   |                    |                    |                    |
| <\$50,000 & >80% Black                                | 0.47 (0.39-0.56)** |                    |                    |
| <\$50,000 & Integrated                                | 0.63 (0.56-0.70)** |                    |                    |
| <\$50,000 & >80% White                                | 0.77 (0.66-0.91)*  |                    |                    |
| ≥\$50,000 & >80% Black                                | 0.77 (0.67-0.90)*  |                    |                    |
| ≥\$50,000 & Integrated                                | 0.71 (0.38-1.33)   |                    |                    |
| ≥\$50,000 & >80% White                                | Ref                |                    |                    |
| <b>\$40,000 &amp; 80% Threshold</b>                   |                    |                    |                    |
| <\$40,000 & >80% Black                                |                    | 0.49 (0.41-0.58)** |                    |
| <\$40,000 & Integrated                                |                    | 0.62 (0.56-0.70)** |                    |
| <\$40,000 & >80% White                                |                    | 0.65 (0.51-0.82)** |                    |
| ≥\$40,000 & >80% Black                                |                    | 0.77 (0.68-0.86)** |                    |
| ≥\$40,000 & Integrated                                |                    | 1.03 (0.64-1.65)   |                    |
| ≥\$40,000 & >80% White                                |                    | Ref                |                    |
| <b>\$30,000 &amp; 80% Threshold</b>                   |                    |                    |                    |
| <\$30,000 & >80% Black                                |                    |                    | 0.48 (0.39-0.58)** |
| <\$30,000 & Integrated                                |                    |                    | 0.60 (0.52-0.69)** |
| <\$30,000 & >80% White                                |                    |                    | 0.70 (0.45-1.10)   |
| ≥\$30,000 & >80% Black                                |                    |                    | 0.59 (0.45-0.76)** |
| ≥\$30,000 & Integrated                                |                    |                    | 0.74 (0.67-0.81)** |
| ≥\$30,000 & >80% White                                |                    |                    | Ref                |

Odds Ratio (95% Confidence Interval)

P value \*<0.05 \*\*<0.001

|                                                     | Model 15           | Model 16           |
|-----------------------------------------------------|--------------------|--------------------|
| Variance Neighborhood Level 2 (n=2403)              | 0.115              | 0.121              |
| Variance Site Level 3 (n=29)                        | 0.14               | 0.135              |
| <b><u>INDIVIDUAL LEVEL VARIABLES</u></b>            |                    |                    |
| Age (Decades)                                       | 0.94 (0.92-0.96)** | 0.94 (0.92-0.96)** |
| Female                                              | 1.01 (0.93-1.09)   | 1.00 (0.93-1.09)   |
| Race/Ethnicity                                      |                    |                    |
| White                                               | Ref                | Ref                |
| Black                                               | 0.75 (0.63-0.84)** | 0.76 (0.68-0.85)** |
| Latino                                              | 0.77 (0.64-0.92)*  | 0.76 (0.64-0.92)*  |
| Other                                               | 0.95 (0.74-1.22)   | 0.95 (0.74-1.21)   |
| Unknown                                             | 0.91 (0.82-1.01)   | 0.91 (0.82-1.01)   |
| Witnessed Arrest                                    | 1.99 (1.84-2.16)** | 1.99 (1.84-2.15)** |
| Public Arrest                                       | 1.71 (1.55-1.88)** | 1.71 (1.55-1.88)** |
| <b><u>NEIGHBORHOOD LEVEL VARIABLES</u></b>          |                    |                    |
| Median Household Income (per \$10,000)              |                    | 1.07 (1.04-1.10)** |
| Median Household Income Category                    |                    |                    |
| <\$25000                                            | 0.80 (0.59-1.08)   |                    |
| \$25001-\$40,000                                    | 0.73 (0.61-0.87)** |                    |
| \$40,001-\$50,000                                   | 0.81 (0.70-0.94)*  |                    |
| \$50,001-\$65,000                                   | 0.82 (0.72-0.94)*  |                    |
| >\$65,001                                           | Ref                |                    |
| SinglePerson Households (per 10% increase)          | 1.00 (0.99-1.01)   | 1.00 (0.99-1.02)   |
| Median Age of Census Tract                          | 0.99 (0.98-1.00)   | 0.99 (0.98-1.00)   |
| High School Diploma and Above (per 10% increase)    | 1.05 (1.01-1.10)*  | 1.05 (1.00-1.10)*  |
| Adults Living Below Poverty Line (per 10% increase) | 0.88 (0.81-0.96)*  | 0.93 (0.87-0.99)*  |

*Odds Ratio (95% Confidence Interval)*

*P value \*<0.05 \*\*<0.001*

|                                                     | Model 17           | Model 18           | Model 19           |
|-----------------------------------------------------|--------------------|--------------------|--------------------|
| Variance Neighborhood Level 2 (n=2403)              | 0.122              | 0.123              | 0.121              |
| Variance Site Level 3 (n=29)                        | 0.131              | 0.131              | 0.125              |
| <b>INDIVIDUAL LEVEL VARIABLES</b>                   |                    |                    |                    |
| Age (Decades)                                       | 0.94 (0.92-0.96)** | 0.94 (0.92-0.96)** | 0.94 (0.92-0.96)** |
| Female                                              | 1.01 (0.93-1.09)   | 1.01 (0.93-1.09)   | 1.01 (0.93-1.09)   |
| Race/Ethnicity                                      |                    |                    |                    |
| White                                               | Ref                | Ref                | Ref                |
| Black                                               | 0.77 (0.68-0.86)** | 0.76 (0.68-0.85)** | 0.76 (0.68-0.85)** |
| Latino                                              | 0.78 (0.65-0.93)*  | 0.78 (0.65-0.93)*  | 0.78 (0.65-0.93)*  |
| Other                                               | 0.96 (0.74-1.23)   | 0.96 (0.75-1.23)   | 0.95 (0.74-1.22)   |
| Unknown                                             | 0.91 (0.82-1.02)   | 0.91 (0.81-1.02)   | 0.91 (0.80-1.03)   |
| Witnessed Arrest                                    | 1.99 (1.84-2.16)** | 2.00 (1.84-2.16)** | 2.00 (1.85-2.16)** |
| Public Arrest                                       | 1.70 (1.54-1.88)** | 1.70 (1.54-1.88)** | 1.69 (1.53-1.87)** |
| <b>NEIGHBORHOOD LEVEL VARIABLES</b>                 |                    |                    |                    |
| SinglePerson Households (per 10% increase)          | 1.00 (0.99-1.00)   | 1.00 (0.99-1.00)   | 1.00 (0.99-1.00)   |
| Median Age of Census Tract                          | 0.99 (0.98-1.00)   | 0.99 (0.98-1.00)   | 0.99 (0.98-1.00)   |
| High School Diploma and Above (per 10% increase)    | 1.06 (1.00-1.11)*  | 1.06 (1.02-1.11)*  | 1.08 (1.03-1.13)*  |
| Adults Living Below Poverty Line (per 10% increase) | 0.90 (0.84-0.96)*  | 0.91 (0.85-0.98)*  | 0.86 (0.79-0.93)*  |
| Median Household Income and Racial Composition      |                    |                    |                    |
| \$50,000 & 90% Threshold                            |                    |                    |                    |
| <\$50,000 & >90% Black                              | 0.71 (0.55-0.92)*  |                    |                    |
| <\$50,000 & Integrated                              | 0.76 (0.64-0.91)*  |                    |                    |
| <\$50,000 & >90% White                              | 0.91 (0.70-1.18)   |                    |                    |
| ≥\$50,000 & >90% Black                              | 0.73 (0.36-1.50)   |                    |                    |
| ≥\$50,000 & Integrated                              | 0.87 (0.74-1.02)   |                    |                    |
| ≥\$50,000 & >90% White                              | Ref                |                    |                    |
| \$40,000 & 90% Threshold                            |                    |                    |                    |
| <\$40,000 & >90% Black                              |                    | 0.69 (0.53-0.90)*  |                    |
| <\$40,000 & Integrated                              |                    | 0.75 (0.62-0.90)*  |                    |
| <\$40,000 & >90% White                              |                    | 0.92 (0.60-1.40)   |                    |
| ≥\$40,000 & >90% Black                              |                    | 0.87 (0.46-1.63)   |                    |
| ≥\$40,000 & Integrated                              |                    | 0.91 (0.49-1.69)   |                    |
| ≥\$40,000 & >90% White                              |                    | Ref                |                    |
| \$30,000 & 90% Threshold                            |                    |                    |                    |
| <\$30,000 & >90% Black                              |                    |                    | 0.89 (0.66-1.20)   |
| <\$30,000 & Integrated                              |                    |                    | 0.95 (0.77-1.19)   |
| <\$30,000 & >90% White                              |                    |                    | 1.69 (0.55-5.22)   |
| ≥\$30,000 & >90% Black                              |                    |                    | 0.75 (0.52-1.08)   |
| ≥\$30,000 & Integrated                              |                    |                    | 0.85 (0.74-0.98)   |
| ≥\$30,000 & >90% White                              |                    |                    | Ref                |

Odds Ratio (95% Confidence Interval)

P value \*<0.05 \*\*<0.001



|                                                     | Model 20           | Model 21           | Model 22           |
|-----------------------------------------------------|--------------------|--------------------|--------------------|
| Variance Neighborhood Level 2 (n=2403)              | 0.121              | 0.12               | 0.12               |
| Variance Site Level 3 (n=29)                        | 0.125              | 0.129              | 0.122              |
| <b>INDIVIDUAL LEVEL VARIABLES</b>                   |                    |                    |                    |
| Age (Decades)                                       | 0.94 (0.92-0.96)** | 0.94 (0.92-0.96)** | 0.94 (0.92-0.96)** |
| Female                                              | 1.01 (0.93-1.09)   | 1.01 (0.93-1.09)   | 1.01 (0.93-1.09)   |
| Race/Ethnicity                                      |                    |                    |                    |
| White                                               | Ref                | Ref                | Ref                |
| Black                                               | 0.78 (0.70-0.88)** | 0.78 (0.70-0.88)** | 0.78 (0.70-0.88)** |
| Latino                                              | 0.78 (0.65-0.93)*  | 0.78 (0.65-0.93)*  | 0.78 (0.65-0.93)*  |
| Other                                               | 0.97 (0.75-1.25)   | 0.97 (0.76-1.25)   | 0.97 (0.75-1.25)   |
| Unknown                                             | 0.92 (0.82-1.02)   | 0.92 (0.82-1.02)   | 0.92 (0.82-1.03)   |
| Witnessed Arrest                                    | 2.00 (1.85-2.16)** | 2.00 (1.84-2.16)** | 2.00 (1.85-2.17)** |
| Public Arrest                                       | 1.70 (1.54-1.87)** | 1.70 (1.54-1.87)** | 1.69 (1.53-1.86)** |
| <b>NEIGHBORHOOD LEVEL VARIABLES</b>                 |                    |                    |                    |
| SinglePerson Households (per 10% increase)          | 1.00 (0.99-1.00)   | 1.00 (0.99-1.00)   | 1.00 (0.99-1.00)   |
| Median Age of Census Tract                          | 0.99 (0.98-1.00)   | 0.99 (0.98-1.00)   | 0.99 (0.98-1.00)   |
| High School Diploma and Above (per 10% increase)    | 1.06 (1.01-1.11)*  | 1.06 (1.01-1.11)*  | 1.07 (1.02-1.11)*  |
| Adults Living Below Poverty Line (per 10% increase) | 0.90 (0.84-0.97)*  | 0.92 (0.86-0.99)*  | 0.87 (0.80-0.95)*  |
| Median Household Income and Racial Composition      |                    |                    |                    |
| \$50,000 & 80% Threshold                            |                    |                    |                    |
| <\$50,000 & >80% Black                              | 0.66 (0.53-0.83)** |                    |                    |
| <\$50,000 & Integrated                              | 0.77 (0.66-0.89)** |                    |                    |
| <\$50,000 & >80% White                              | 0.84 (0.71-0.99)*  |                    |                    |
| ≥\$50,000 & >80% Black                              | 0.79 (0.68-0.91)*  |                    |                    |
| ≥\$50,000 & Integrated                              | 0.74 (0.40-1.38)   |                    |                    |
| ≥\$50,000 & >80% White                              | Ref                |                    |                    |
| \$40,000 & 80% Threshold                            |                    |                    |                    |
| <\$40,000 & >80% Black                              |                    | 0.62 (0.50-0.78)** |                    |
| <\$40,000 & Integrated                              |                    | 0.75 (0.64-0.88)*  |                    |
| <\$40,000 & >80% White                              |                    | 0.74 (0.58-0.95)*  |                    |
| ≥\$40,000 & >80% Black                              |                    | 0.79 (0.70-0.89)** |                    |
| ≥\$40,000 & Integrated                              |                    | 1.01 (0.63-1.61)   |                    |
| ≥\$40,000 & >80% White                              |                    | Ref                |                    |
| \$30,000 & 80% Threshold                            |                    |                    |                    |
| <\$30,000 & >80% Black                              |                    |                    | 0.80 (0.61-1.04)   |
| <\$30,000 & Integrated                              |                    |                    | 0.92 (0.75-1.14)   |
| <\$30,000 & >80% White                              |                    |                    | 0.90 (0.57-1.44)   |
| ≥\$30,000 & >80% Black                              |                    |                    | 0.71 (0.54-0.93)*  |
| ≥\$30,000 & Integrated                              |                    |                    | 0.82 (0.73-0.92)*  |
| ≥\$30,000 & >80% White                              |                    |                    | Ref                |

Odds Ratio (95% Confidence Interval)

P value \*<0.05 \*\*<0.001

**Supplementary Appendix Table 3S:** Predicted probability of receiving bystander-initiated cardiopulmonary resuscitation (CPR) stratified by neighborhood income and race or ethnic background, according to type of arrest.

|                                          | <b>Observed<br/>Proportion of<br/>Patients with<br/>Bystander-<br/>Initiated CPR</b> | <b>Predicted<br/>Probability of<br/>Receiving<br/>Bystander-<br/>Initiated CPR</b> | <b>95%<br/>Confidence<br/>Interval</b> |
|------------------------------------------|--------------------------------------------------------------------------------------|------------------------------------------------------------------------------------|----------------------------------------|
| <b><u>Private Unwitnessed Arrest</u></b> |                                                                                      |                                                                                    |                                        |
| <\$40,000 & >80% Black                   | 0.14                                                                                 | 0.13                                                                               | (0.08-0.26)                            |
| <\$40,000 & Integrated                   | 0.19                                                                                 | 0.19                                                                               | (0.08-0.37)                            |
| <\$40,000 & >80% White                   | 0.16                                                                                 | 0.20                                                                               | (0.11-0.36)                            |
| ≥\$40,000 & >80% Black                   | 0.19                                                                                 | 0.20                                                                               | (0.13-0.34)                            |
| ≥\$40,000 & Integrated                   | 0.23                                                                                 | 0.22                                                                               | (0.10-0.45)                            |
| ≥\$40,000 & >80% White                   | 0.27                                                                                 | 0.27                                                                               | (0.12-0.53)                            |
| <b><u>Private Witnessed Arrest</u></b>   |                                                                                      |                                                                                    |                                        |
| <\$40,000 & >80% Black                   | 0.21                                                                                 | 0.22                                                                               | (0.13-0.36)                            |
| <\$40,000 & Integrated                   | 0.30                                                                                 | 0.30                                                                               | (0.17-0.51)                            |
| <\$40,000 & >80% White                   | 0.30                                                                                 | 0.32                                                                               | (0.20-0.50)                            |
| ≥\$40,000 & >80% Black                   | 0.40                                                                                 | 0.35                                                                               | (0.27-0.49)                            |
| ≥\$40,000 & Integrated                   | 0.33                                                                                 | 0.35                                                                               | (0.16-0.60)                            |
| ≥\$40,000 & >80% White                   | 0.41                                                                                 | 0.42                                                                               | (0.23-0.70)                            |
| <b><u>Public Unwitnessed Arrest</u></b>  |                                                                                      |                                                                                    |                                        |
| <\$40,000 & >80% Black                   | 0.15                                                                                 | 0.20                                                                               | (0.14-0.31)                            |
| <\$40,000 & Integrated                   | 0.24                                                                                 | 0.28                                                                               | (0.15-0.52)                            |
| <\$40,000 & >80% White                   | 0.41                                                                                 | 0.30                                                                               | (0.19-0.50)                            |
| ≥\$40,000 & >80% Black                   | 0                                                                                    | N/A                                                                                | N/A                                    |
| ≥\$40,000 & Integrated                   | 0.25                                                                                 | 0.31                                                                               | (0.16-0.50)                            |
| ≥\$40,000 & >80% White                   | 0.38                                                                                 | 0.38                                                                               | (0.25-0.58)                            |
| <b><u>Public Witnessed Arrest</u></b>    |                                                                                      |                                                                                    |                                        |
| <\$40,000 & >80% Black                   | 0.33                                                                                 | 0.34                                                                               | (0.25-0.50)                            |
| <\$40,000 & Integrated                   | 0.44                                                                                 | 0.43                                                                               | (0.23-0.63)                            |
| <\$40,000 & >80% White                   | 0.62                                                                                 | 0.48                                                                               | (0.31-0.66)                            |
| ≥\$40,000 & >80% Black                   | 0.38                                                                                 | 0.45                                                                               | (0.35-0.61)                            |
| ≥\$40,000 & Integrated                   | 0.52                                                                                 | 0.49                                                                               | (0.26-0.70)                            |
| ≥\$40,000 & >80% White                   | 0.59                                                                                 | 0.55                                                                               | (0.36-0.76)                            |

N/A, not applicable

## **The CARES Surveillance Group**

Mike Levy, MD (Anchorage, Alaska); Joseph Barger, MD (Contra Costa County, California); James V. Dunford, MD (San Diego County, California); Karl Sporer, MD (San Francisco County, California); Angelo Salvucci, MD (Ventura County, California); David Ross, MD (Colorado Springs, Colorado); Christopher Colwell, MD (Denver, Colorado); Dorothy Turnbull, MD (Stamford, Connecticut); Rob Rosenbaum, MD (New Castle County, Delaware); Kathleen Schrank, MD (Miami, Florida); Mark Waterman, MD (Atlanta, Georgia); Richard Dukes, MD (Clayton County, Georgia); Raymond Fowler, MD (Douglas County, Georgia); John Lloyd, MD (Forest Park, Georgia); Art Yancey, MD (Atlanta, Georgia); Earl Grubbs, MD (Gwinnett County, Georgia); John Lloyd, MD (Hapeville, Georgia); Johnathan Morris, MD (Metro Atlanta, Georgia); Stephen Boyle, MD (Metro Atlanta, Georgia); Troy Johnson, MD (Newton County, Georgia); Christopher Wizner, MD (Puckett County, Georgia); Melissa White, MD (Metro Atlanta, Georgia); Sabina Braithwaite, MD (Sedgwick County, Kansas); Sophia Dyer, MD (Boston, Massachusetts); Gary Setnik, MD (Cambridge, Massachusetts); Bob Hassett, MD (Springfield, Massachusetts); John Santor, MD (Springfield, Massachusetts); Bob Swor, MD (Oakland County, Michigan); Todd Chassee, MD (Kent County, Michigan); Charlie Lick, MD (Hennepin County, Minnesota); Mike Parrish (Hennepin County, Minnesota); Darel Radde (Hennepin County, Minnesota); Brian Mahoney, MD (Hennepin County, Minnesota); Darell Todd (Hennepin County, Minnesota); Joseph Salomone, MD (Kansas City, Missouri); Eric Ossman, MD (Durham, North Carolina); Brent Myers, MD (Wake County, North Carolina); Lee Garvey, MD (Charlotte, North Carolina); James Camerson, MD (New Jersey); David Slattery, MD (Las Vegas, Nevada); Joseph Ryan, MD (Reno, Nevada); Jason McMullan, MD (Cincinnati, Ohio); David Keseg, MD (Columbus, Ohio); James Leaming, MD (Hershey, Pennsylvania); BK Sherwood, MD (Hilton Head, South Carolina); Jeff Luther, MD (Sioux Falls, South Dakota); Corey Slovis, MD (Nashville, Tennessee); Paul Hinchey, MD (Austin-Travis County, Texas); Michael Harrington, MD (Baytown, Texas); John Griswell, MD and Jeff Beeson, MD (Fort Worth, Texas); David Persse, MD (Houston, Texas); Mark Gamber, MD (Plano, Texas); and Joe Ornato, MD (Richmond, Virginia).
